# Supplementary material for: Osteosarcoma Cell‐Derived Exosomal miR‐1307 Promotes Tumorgenesis via Targeting AGAP1
Source: Hindawi journal article supplement (doi:10.1155/2021/7358153), 2021-01-01
Supplement: f1 [file 7358153.f1.pdf]

**Table S1 Detailed clinical data of 18 patients with osteosarcoma**

| N  | Age | Gender | Tumor location | Tumor size (cm) | Enneking stage | Histologic type                | Pulmonary metastasis | Pathological fracture | Serum AKP levels before treatment | KPS score |
|----|-----|--------|----------------|-----------------|----------------|--------------------------------|----------------------|-----------------------|-----------------------------------|-----------|
| 1  | 9   | Female | Femur          | 4.5             | II B           | Osteoblastic                   | No                   | No                    | Increase                          | 80        |
| 2  | 11  | Female | Tibia          | 5.4             | II B           | Fibroblast                     | No                   | No                    | Increase                          | 80        |
| 3  | 11  | Male   | Femur          | 4.8             | II B           | Chondroblast                   | No                   | No                    | Increase                          | 80        |
| 4  | 12  | Male   | Femur          | 3.7             | II B           | Osteoblastic                   | No                   | No                    | Normal                            | 80        |
| 5  | 14  | Female | Tibia          | 3               | I B            | Well differentiated in bone    | No                   | No                    | Normal                            | 90        |
| 6  | 15  | Female | Femur          | 9.2             | III            | Dedifferentiated parosteal     | Yes                  | No                    | Increase                          | 70        |
| 7  | 15  | Male   | Femur          | 3.4             | II B           | Chondroblast                   | No                   | No                    | Normal                            | 80        |
| 8  | 18  | Male   | Humerus        | 3.3             | I B            | Parosteal                      | No                   | No                    | Normal                            | 90        |
| 9  | 20  | Male   | Femur          | 8.8             | III            | Round cell                     | Yes                  | No                    | Increase                          | 70        |
| 10 | 21  | Female | Spine          | 3.8             | II B           | Osteoblastic                   | No                   | No                    | Increase                          | 80        |
| 11 | 24  | Male   | Tibia          | 11.6            | III            | Malignant fibrous histiocytoma | Yes                  | No                    | Increase                          | 70        |
| 12 | 29  | Male   | Femur          | 10.4            | III            | Telangiectatic                 | Yes                  | Yes                   | Increase                          | 60        |
| 13 | 33  | Male   | Humerus        | 2.5             | I A            | Parosteal                      | No                   | No                    | Normal                            | 90        |
| 14 | 36  | Female | Tibia          | 4.1             | II B           | Osteoblastic                   | No                   | No                    | Increase                          | 80        |
| 15 | 41  | Male   | Femur          | 4.4             | II B           | Fibroblast                     | No                   | No                    | Normal                            | 80        |
| 16 | 48  | Female | Tibia          | 5               | II B           | Osteoblastic                   | No                   | No                    | Increase                          | 80        |
| 17 | 55  | Female | Femur          | 12.3            | III            | Telangiectatic                 | Yes                  | Yes                   | Increase                          | 50        |
| 18 | 61  | Male   | Femur          | 5.4             | II B           | Fibroblast                     | No                   | No                    | Increase                          | 80        |
